# Supplementary material for: Veratramine modulates AP-1-dependent gene transcription by directly binding to programmable DNA
Source: PubMed Central journal article supplement — Nucleic Acids Res. 2017 Dec 9;46(2):546–57. doi: 10.1093/nar/gkx1241 (PMC5778533; doi:10.1093/nar/gkx1241), 2017-12-09
Supplement: gkx1241_supp.pdf [file gkx1241_supp.pdf]

# Supporting Information

Table S1. Effect of 18 different compounds on AP-1 or NF- $\kappa$ B activity.

| ID            | Structure                                                                          | NF- $\kappa$ B activity                                                                                                                                                                                                                                                                                                                                                                                                                                                                                                     | AP-1 activity |                        |   |      |              |      |             |      |            |      |            |      |                                                                                                                                                                                                                                                                                                                                                                                                                                                                                                           |               |                        |   |       |           |       |            |      |            |      |            |      |
|---------------|------------------------------------------------------------------------------------|-----------------------------------------------------------------------------------------------------------------------------------------------------------------------------------------------------------------------------------------------------------------------------------------------------------------------------------------------------------------------------------------------------------------------------------------------------------------------------------------------------------------------------|---------------|------------------------|---|------|--------------|------|-------------|------|------------|------|------------|------|-----------------------------------------------------------------------------------------------------------------------------------------------------------------------------------------------------------------------------------------------------------------------------------------------------------------------------------------------------------------------------------------------------------------------------------------------------------------------------------------------------------|---------------|------------------------|---|-------|-----------|-------|------------|------|------------|------|------------|------|
| 648           | 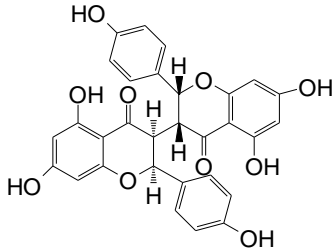  |  <table border="1"><caption>NF-<math>\kappa</math>B activity for compound 648</caption><thead><tr><th>Concentration</th><th>Fluorescence Intensity</th></tr></thead><tbody><tr><td>0</td><td>~230</td></tr><tr><td>1.25 <math>\mu</math>M</td><td>~240</td></tr><tr><td>2.5 <math>\mu</math>M</td><td>~220</td></tr><tr><td>5 <math>\mu</math>M</td><td>~200</td></tr><tr><td>10 <math>\mu</math>M</td><td>~150</td></tr></tbody></table> | Concentration | Fluorescence Intensity | 0 | ~230 | 1.25 $\mu$ M | ~240 | 2.5 $\mu$ M | ~220 | 5 $\mu$ M  | ~200 | 10 $\mu$ M | ~150 |  <table border="1"><caption>AP-1 activity for compound 648</caption><thead><tr><th>Concentration</th><th>Fluorescence Intensity</th></tr></thead><tbody><tr><td>0</td><td>~1350</td></tr><tr><td>5 <math>\mu</math>M</td><td>~1050</td></tr><tr><td>10 <math>\mu</math>M</td><td>~250</td></tr><tr><td>20 <math>\mu</math>M</td><td>~100</td></tr><tr><td>40 <math>\mu</math>M</td><td>~100</td></tr></tbody></table>  | Concentration | Fluorescence Intensity | 0 | ~1350 | 5 $\mu$ M | ~1050 | 10 $\mu$ M | ~250 | 20 $\mu$ M | ~100 | 40 $\mu$ M | ~100 |
| Concentration | Fluorescence Intensity                                                             |                                                                                                                                                                                                                                                                                                                                                                                                                                                                                                                             |               |                        |   |      |              |      |             |      |            |      |            |      |                                                                                                                                                                                                                                                                                                                                                                                                                                                                                                           |               |                        |   |       |           |       |            |      |            |      |            |      |
| 0             | ~230                                                                               |                                                                                                                                                                                                                                                                                                                                                                                                                                                                                                                             |               |                        |   |      |              |      |             |      |            |      |            |      |                                                                                                                                                                                                                                                                                                                                                                                                                                                                                                           |               |                        |   |       |           |       |            |      |            |      |            |      |
| 1.25 $\mu$ M  | ~240                                                                               |                                                                                                                                                                                                                                                                                                                                                                                                                                                                                                                             |               |                        |   |      |              |      |             |      |            |      |            |      |                                                                                                                                                                                                                                                                                                                                                                                                                                                                                                           |               |                        |   |       |           |       |            |      |            |      |            |      |
| 2.5 $\mu$ M   | ~220                                                                               |                                                                                                                                                                                                                                                                                                                                                                                                                                                                                                                             |               |                        |   |      |              |      |             |      |            |      |            |      |                                                                                                                                                                                                                                                                                                                                                                                                                                                                                                           |               |                        |   |       |           |       |            |      |            |      |            |      |
| 5 $\mu$ M     | ~200                                                                               |                                                                                                                                                                                                                                                                                                                                                                                                                                                                                                                             |               |                        |   |      |              |      |             |      |            |      |            |      |                                                                                                                                                                                                                                                                                                                                                                                                                                                                                                           |               |                        |   |       |           |       |            |      |            |      |            |      |
| 10 $\mu$ M    | ~150                                                                               |                                                                                                                                                                                                                                                                                                                                                                                                                                                                                                                             |               |                        |   |      |              |      |             |      |            |      |            |      |                                                                                                                                                                                                                                                                                                                                                                                                                                                                                                           |               |                        |   |       |           |       |            |      |            |      |            |      |
| Concentration | Fluorescence Intensity                                                             |                                                                                                                                                                                                                                                                                                                                                                                                                                                                                                                             |               |                        |   |      |              |      |             |      |            |      |            |      |                                                                                                                                                                                                                                                                                                                                                                                                                                                                                                           |               |                        |   |       |           |       |            |      |            |      |            |      |
| 0             | ~1350                                                                              |                                                                                                                                                                                                                                                                                                                                                                                                                                                                                                                             |               |                        |   |      |              |      |             |      |            |      |            |      |                                                                                                                                                                                                                                                                                                                                                                                                                                                                                                           |               |                        |   |       |           |       |            |      |            |      |            |      |
| 5 $\mu$ M     | ~1050                                                                              |                                                                                                                                                                                                                                                                                                                                                                                                                                                                                                                             |               |                        |   |      |              |      |             |      |            |      |            |      |                                                                                                                                                                                                                                                                                                                                                                                                                                                                                                           |               |                        |   |       |           |       |            |      |            |      |            |      |
| 10 $\mu$ M    | ~250                                                                               |                                                                                                                                                                                                                                                                                                                                                                                                                                                                                                                             |               |                        |   |      |              |      |             |      |            |      |            |      |                                                                                                                                                                                                                                                                                                                                                                                                                                                                                                           |               |                        |   |       |           |       |            |      |            |      |            |      |
| 20 $\mu$ M    | ~100                                                                               |                                                                                                                                                                                                                                                                                                                                                                                                                                                                                                                             |               |                        |   |      |              |      |             |      |            |      |            |      |                                                                                                                                                                                                                                                                                                                                                                                                                                                                                                           |               |                        |   |       |           |       |            |      |            |      |            |      |
| 40 $\mu$ M    | ~100                                                                               |                                                                                                                                                                                                                                                                                                                                                                                                                                                                                                                             |               |                        |   |      |              |      |             |      |            |      |            |      |                                                                                                                                                                                                                                                                                                                                                                                                                                                                                                           |               |                        |   |       |           |       |            |      |            |      |            |      |
| 831           |  |  <table border="1"><caption>NF-<math>\kappa</math>B activity for compound 831</caption><thead><tr><th>Concentration</th><th>Fluorescence Intensity</th></tr></thead><tbody><tr><td>0</td><td>~230</td></tr><tr><td>5 <math>\mu</math>M</td><td>~170</td></tr><tr><td>10 <math>\mu</math>M</td><td>~210</td></tr><tr><td>20 <math>\mu</math>M</td><td>~190</td></tr><tr><td>40 <math>\mu</math>M</td><td>~150</td></tr></tbody></table>   | Concentration | Fluorescence Intensity | 0 | ~230 | 5 $\mu$ M    | ~170 | 10 $\mu$ M  | ~210 | 20 $\mu$ M | ~190 | 40 $\mu$ M | ~150 |  <table border="1"><caption>AP-1 activity for compound 831</caption><thead><tr><th>Concentration</th><th>Fluorescence Intensity</th></tr></thead><tbody><tr><td>0</td><td>~1350</td></tr><tr><td>5 <math>\mu</math>M</td><td>~1550</td></tr><tr><td>10 <math>\mu</math>M</td><td>~900</td></tr><tr><td>20 <math>\mu</math>M</td><td>~750</td></tr><tr><td>40 <math>\mu</math>M</td><td>~700</td></tr></tbody></table> | Concentration | Fluorescence Intensity | 0 | ~1350 | 5 $\mu$ M | ~1550 | 10 $\mu$ M | ~900 | 20 $\mu$ M | ~750 | 40 $\mu$ M | ~700 |
| Concentration | Fluorescence Intensity                                                             |                                                                                                                                                                                                                                                                                                                                                                                                                                                                                                                             |               |                        |   |      |              |      |             |      |            |      |            |      |                                                                                                                                                                                                                                                                                                                                                                                                                                                                                                           |               |                        |   |       |           |       |            |      |            |      |            |      |
| 0             | ~230                                                                               |                                                                                                                                                                                                                                                                                                                                                                                                                                                                                                                             |               |                        |   |      |              |      |             |      |            |      |            |      |                                                                                                                                                                                                                                                                                                                                                                                                                                                                                                           |               |                        |   |       |           |       |            |      |            |      |            |      |
| 5 $\mu$ M     | ~170                                                                               |                                                                                                                                                                                                                                                                                                                                                                                                                                                                                                                             |               |                        |   |      |              |      |             |      |            |      |            |      |                                                                                                                                                                                                                                                                                                                                                                                                                                                                                                           |               |                        |   |       |           |       |            |      |            |      |            |      |
| 10 $\mu$ M    | ~210                                                                               |                                                                                                                                                                                                                                                                                                                                                                                                                                                                                                                             |               |                        |   |      |              |      |             |      |            |      |            |      |                                                                                                                                                                                                                                                                                                                                                                                                                                                                                                           |               |                        |   |       |           |       |            |      |            |      |            |      |
| 20 $\mu$ M    | ~190                                                                               |                                                                                                                                                                                                                                                                                                                                                                                                                                                                                                                             |               |                        |   |      |              |      |             |      |            |      |            |      |                                                                                                                                                                                                                                                                                                                                                                                                                                                                                                           |               |                        |   |       |           |       |            |      |            |      |            |      |
| 40 $\mu$ M    | ~150                                                                               |                                                                                                                                                                                                                                                                                                                                                                                                                                                                                                                             |               |                        |   |      |              |      |             |      |            |      |            |      |                                                                                                                                                                                                                                                                                                                                                                                                                                                                                                           |               |                        |   |       |           |       |            |      |            |      |            |      |
| Concentration | Fluorescence Intensity                                                             |                                                                                                                                                                                                                                                                                                                                                                                                                                                                                                                             |               |                        |   |      |              |      |             |      |            |      |            |      |                                                                                                                                                                                                                                                                                                                                                                                                                                                                                                           |               |                        |   |       |           |       |            |      |            |      |            |      |
| 0             | ~1350                                                                              |                                                                                                                                                                                                                                                                                                                                                                                                                                                                                                                             |               |                        |   |      |              |      |             |      |            |      |            |      |                                                                                                                                                                                                                                                                                                                                                                                                                                                                                                           |               |                        |   |       |           |       |            |      |            |      |            |      |
| 5 $\mu$ M     | ~1550                                                                              |                                                                                                                                                                                                                                                                                                                                                                                                                                                                                                                             |               |                        |   |      |              |      |             |      |            |      |            |      |                                                                                                                                                                                                                                                                                                                                                                                                                                                                                                           |               |                        |   |       |           |       |            |      |            |      |            |      |
| 10 $\mu$ M    | ~900                                                                               |                                                                                                                                                                                                                                                                                                                                                                                                                                                                                                                             |               |                        |   |      |              |      |             |      |            |      |            |      |                                                                                                                                                                                                                                                                                                                                                                                                                                                                                                           |               |                        |   |       |           |       |            |      |            |      |            |      |
| 20 $\mu$ M    | ~750                                                                               |                                                                                                                                                                                                                                                                                                                                                                                                                                                                                                                             |               |                        |   |      |              |      |             |      |            |      |            |      |                                                                                                                                                                                                                                                                                                                                                                                                                                                                                                           |               |                        |   |       |           |       |            |      |            |      |            |      |
| 40 $\mu$ M    | ~700                                                                               |                                                                                                                                                                                                                                                                                                                                                                                                                                                                                                                             |               |                        |   |      |              |      |             |      |            |      |            |      |                                                                                                                                                                                                                                                                                                                                                                                                                                                                                                           |               |                        |   |       |           |       |            |      |            |      |            |      |

1326

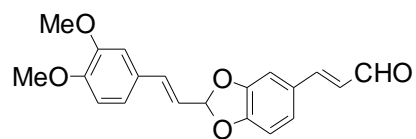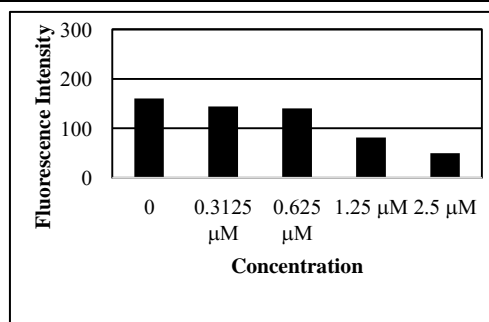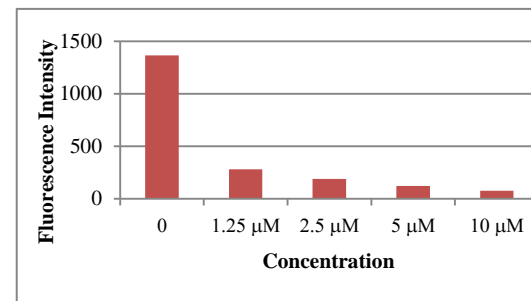

1337

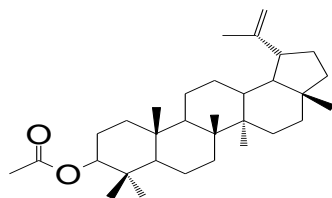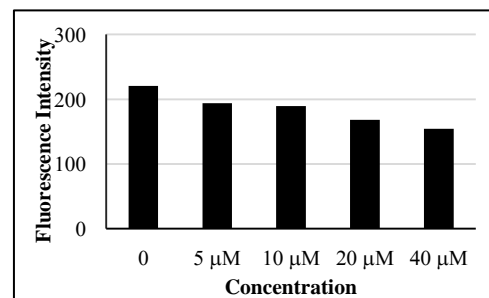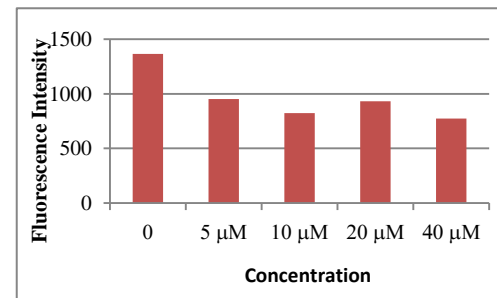

586

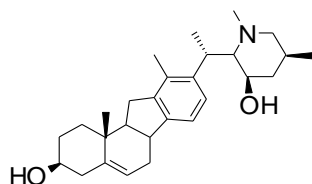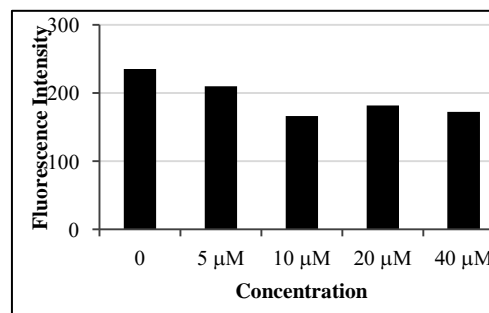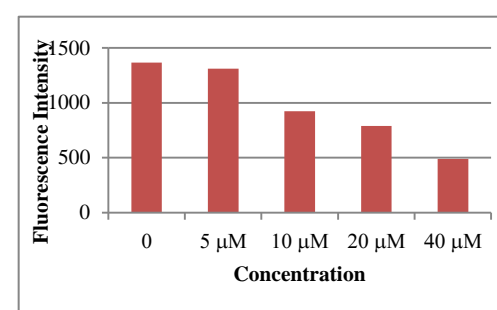

1125

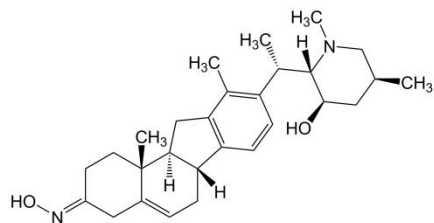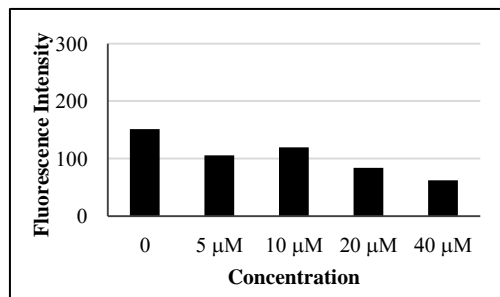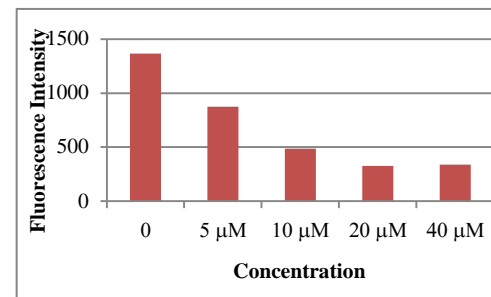

1126

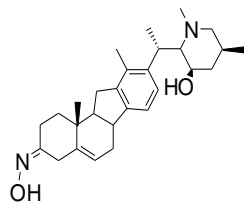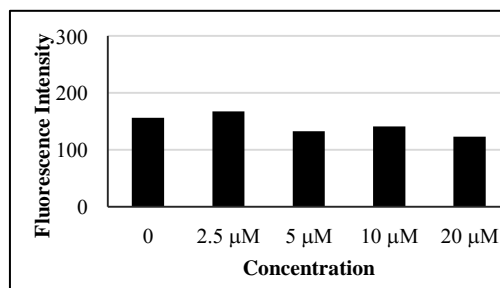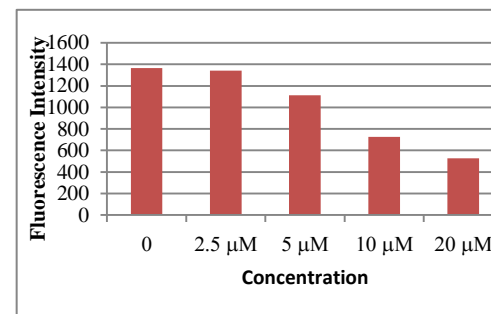

1134

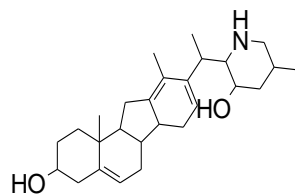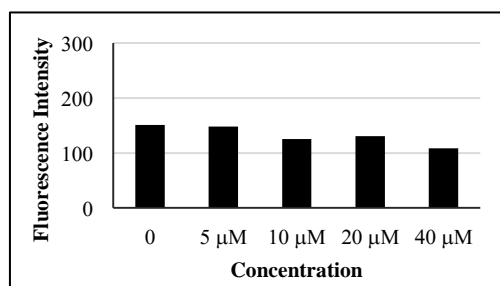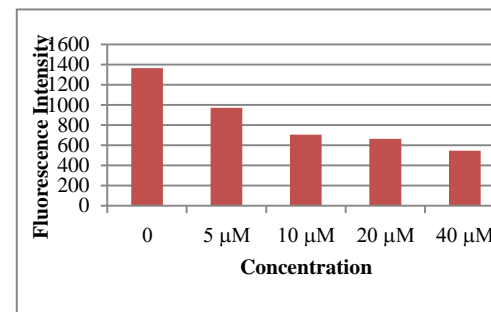

1423

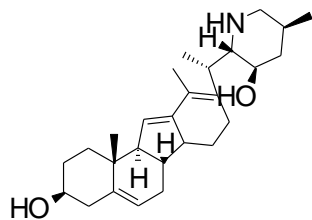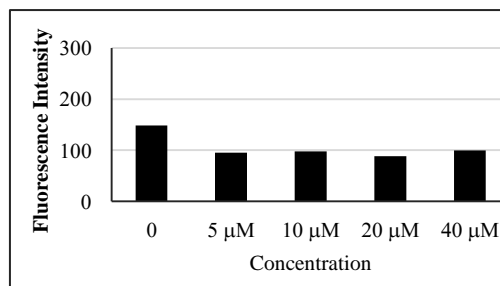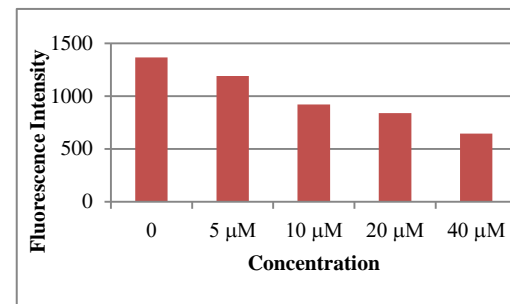

1451

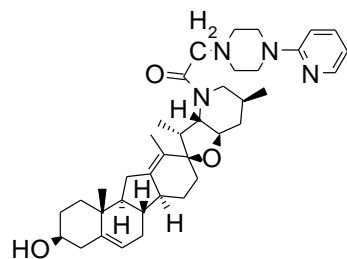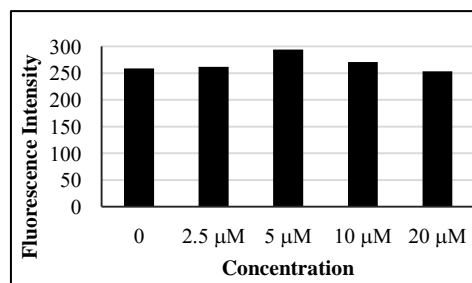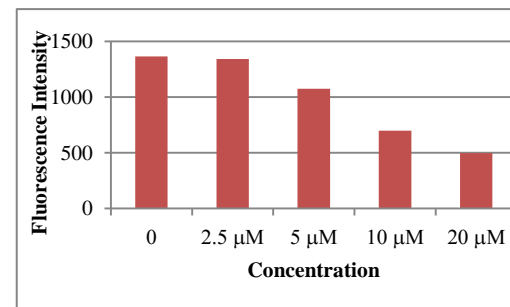

1460

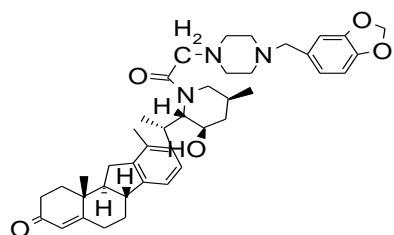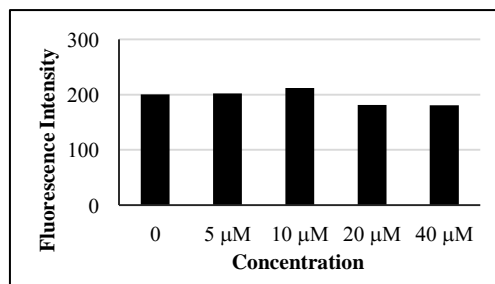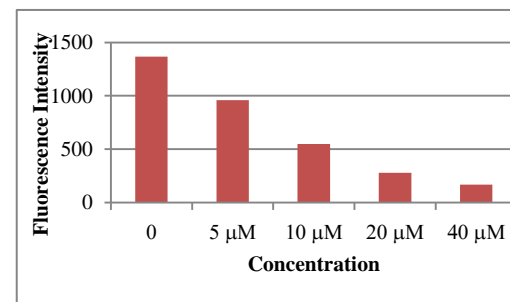

1504

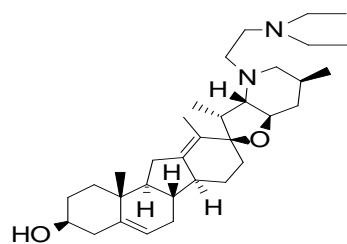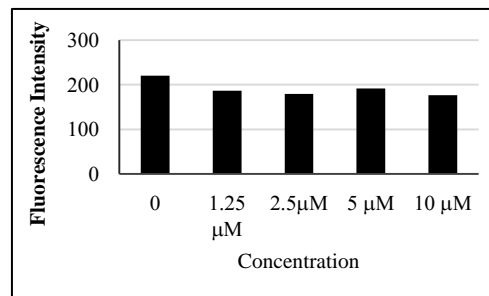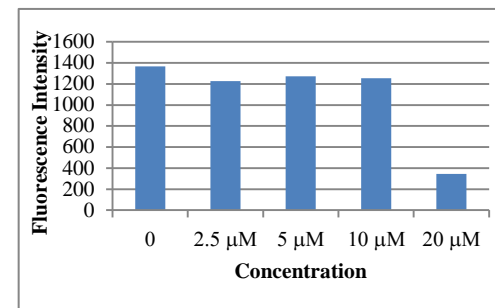

1512

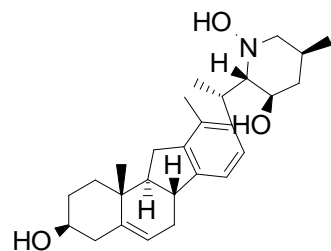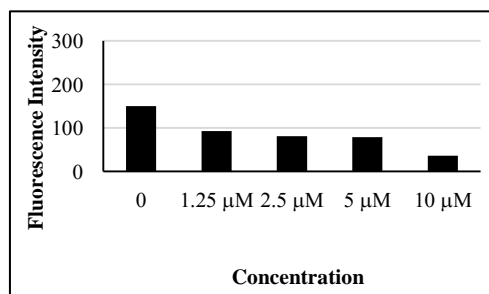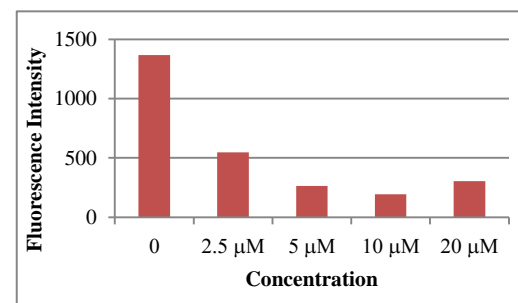

1037

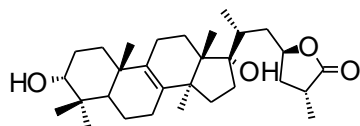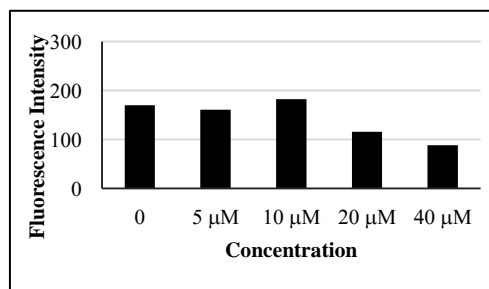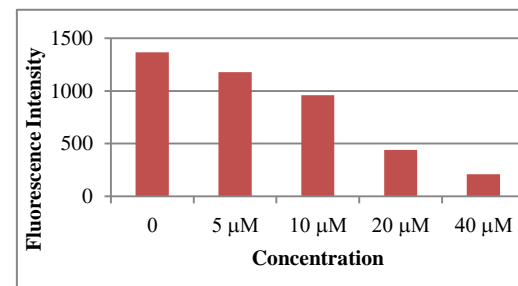

1529  
(Veratramine)

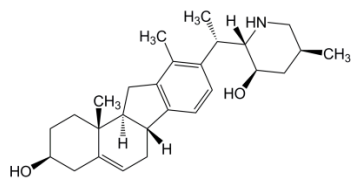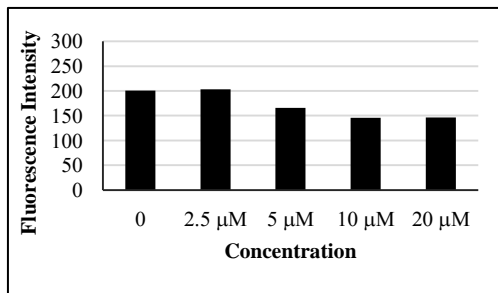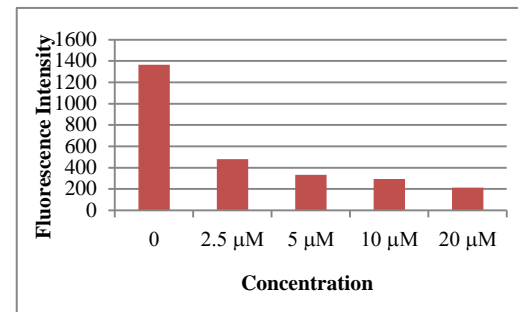

1530

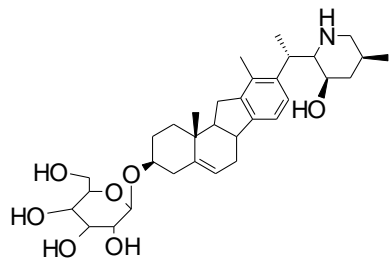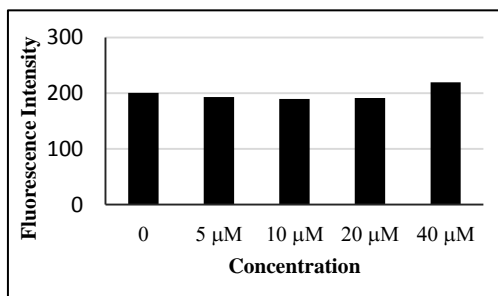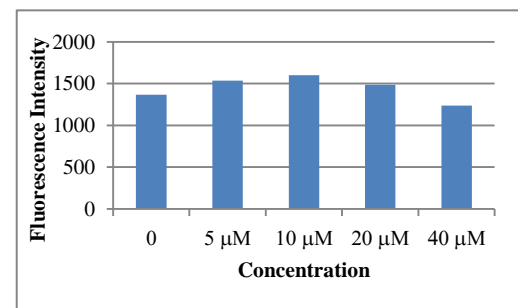

1474

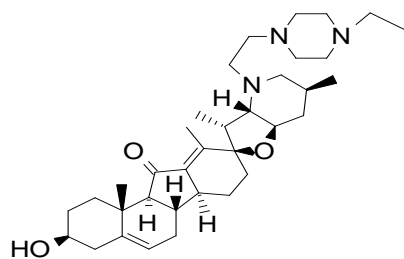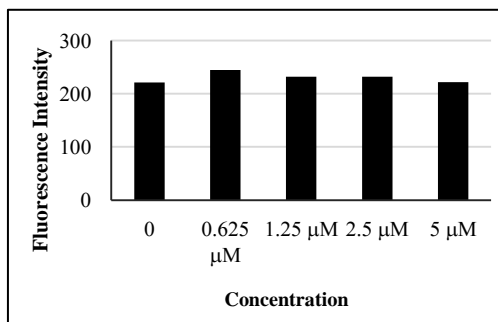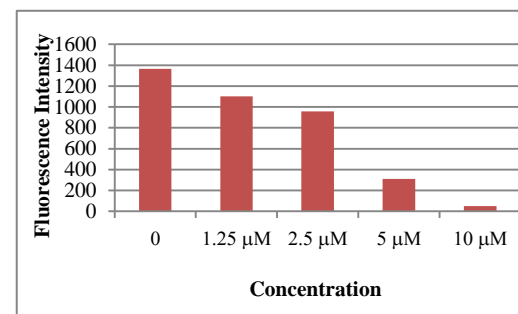

1517

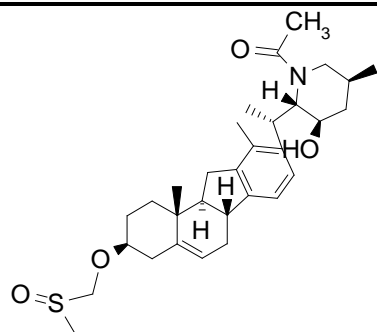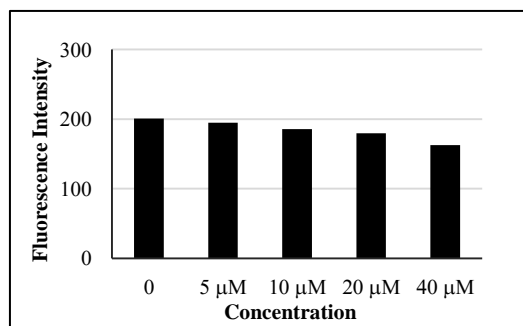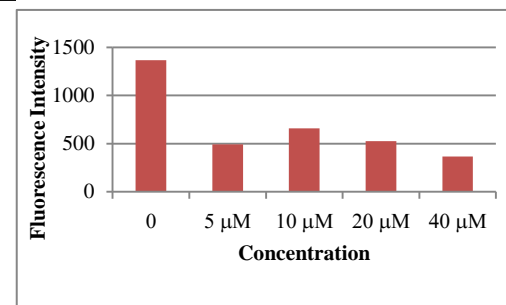

<sup>a</sup>Bioactivity data was not determined.

**Table S2.** Log2 fold changes in MAPK gene expression after treatment with veratramine or its analogue compounds 1125 or 1126.

| Gene         | Protein | Compound          |          |          |
|--------------|---------|-------------------|----------|----------|
|              |         | 1125              | 1126     | 1529     |
| <i>Mapk1</i> | ERK2    | 0.205009          | 0.15988  | 0.022198 |
| Mapk10       | JNK3    | N.A. <sup>a</sup> | NA       | NA       |
| Mapk11       | P38b    | -1.09863          | -0.45989 | -0.03327 |
| Mapk12       | p38r    | 0.158206          | 0.004317 | -0.41042 |
| Mapk13       | p38s    | N.A.              | -0.26227 | NA       |
| Mapk14       | p38a    | 0.503937          | -0.16601 | -0.05641 |
| Mapk8        | JNK1    | -0.14252          | 9.48E-05 | 0.014034 |
| Mapk9        | JNk2    | 0.192236          | 0.430562 | -0.25418 |
| Mapk3        | ERK1    | -0.21661          | -0.0048  | 0.28699  |

<sup>a</sup>Data not available



**Figure S1.** Gene set enrichment analysis (GSEA) confirms repression of downstream genes of AP1, but upregulation of upstream genes of AP1. Microarray data were analyzed using GSEA software to judge the modulation of AP-1 pathway genes by veratramine (1529), and the other two analogues (1125 and 1126). (a) In the enrichment plot, genes are ranked by signal/noise ratio according to their differential expression between the compound treated (10  $\mu$ M 1529, 20 $\mu$ M 1125 or 1126) and control (treated with DMSO) mouse epidermal JB6 cell lines (three samples for each). Genes related AP-1 are ranked with vertical bars and the enrichment score is show in green. (b) Relative expression of AP-1 related genes in compound treated and control cell lines.

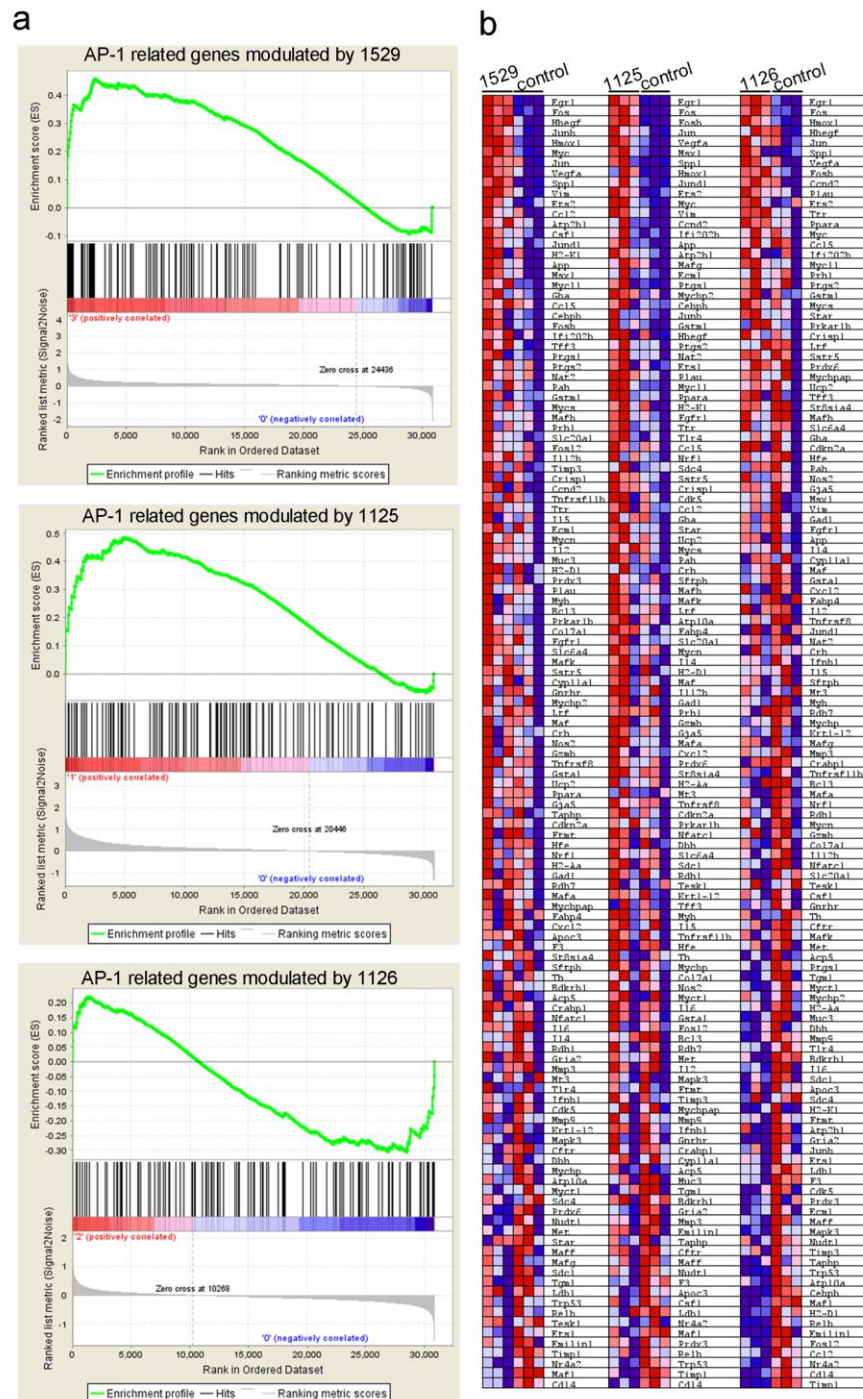

## Brief description of iDNABinder

iDNABinder is an in-house specific molecular docking tool for DNA-ligand docking, whose scoring function comprises DNA-specific knowledge-based and force field-based scoring functions. The knowledge-based scoring function is defined as the sum of all weighted DNA-ligand atom pair potentials  $A_{ij}(r)$  at a distance  $r$  within the given distance  $r_{\text{cut-off}}$  (8.0 Å) as shown in equation 1,

$$U = \sum_i^{\text{lig}} \sum_j^{\text{rec}} A_{ij}(r) \quad r \leq r_{\text{cut-off}} \quad (1)$$

where  $A_{ij}(r)$  is the atom-pair potential terms between ligand atom  $i$  and DNA atom  $j$ , which is obtained on the basis of the conventional inverse Boltzmann relation as shown in equation 2,

$$A_{ij}(r) = -k_B T \ln[f_{\text{vol\_corr}}^i(r) \rho_{\text{seg}}^{ij}(r) / \rho_{\text{bulk}}^{ij}(r)] \quad (2)$$

where  $T$  is the absolute temperature,  $k_B$  is the Boltzmann constant,  $f_{\text{vol\_corr}}^i(r)$  is the ligand volume correction factor,  $\rho_{\text{seg}}^{ij}(r)$  is the number density of atom pair  $(i, j)$  that occurs in a spherical shell between  $r$  and  $r+\Delta r$ , and  $\rho_{\text{bulk}}^{ij}(r)$  is the number density of atom pair  $(i, j)$  that occurs in a reference sphere with radius  $R$ . In this study, we set  $R = 12.0$  Å and  $\Delta r = 0.2$  Å. Detailed calculations for  $\rho_{\text{seg}}^{ij}(r)$  and  $\rho_{\text{bulk}}^{ij}(r)$  are similar as that reported in our previous work for developing KScore(1) and MpSDock<sub>Zn</sub>(2).

The force-field scoring function, including non-bonded Van der Waals interaction  $E_{ik,MMFF94}^{\text{vdW}}$  and electrostatic interaction  $E_{ik,MMFF94}^{\text{es}}$  (equation 3), is used to optimize the binding conformation of ligand, which is developed based on the MMFF94 force field(3).

$$E_{\text{lig}} = \sum_i^{\text{lig}} \sum_{k, i \neq k}^{\text{lig}} E_{ik,MMFF94}^{\text{vdW}}(r) + \sum_i^{\text{lig}} \sum_{k, i \neq k}^{\text{lig}} E_{ik,MMFF94}^{\text{es}}(r) \quad (3)$$

Given the different units between the knowledge-based and force field based scoring functions, the two scoring functions are designed as independent objective functions, which makes the docking process become a balanced optimization with a multi-objective optimization algorithm (nonsorting genetic algorithm II [NSGA II](4)).

## References

1. Zhao, X., Liu, X., Wang, Y., Chen, Z., Kang, L., Zhang, H., Luo, X., Zhu, W., Chen, K., Li, H. et al. (2008) An Improved PMF Scoring Function for Universally Predicting the Interactions of a Ligand with Protein, DNA, and RNA. J. Chem. Infor. Model., 48, 1438-1447.

2. Bai, F., Liao, S., Gu, J., Jiang, H., Wang, X. and Li, H. (2015) An Accurate Metalloprotein-Specific Scoring Function and Molecular Docking Program Devised by a Dynamic Sampling and Iteration Optimization Strategy. *J.Chem. Infor. Model.*, 55, 833-847.
3. Halgren, T.A. (1996) Merck molecular force field. I. Basis, form, scope, parameterization, and performance of MMFF94. *J. Comput. Chem.*, 17, 490-519.
4. Deb, K., Pratap, A., Agarwal, S. and Meyarivan, T. (2002) A fast and elitist multiobjective genetic algorithm: NSGA-II. *IEEE Trans. Evolut. Comput.*, 6, 182-197.
